# Supplementary material
Source: PubMed Central journal article supplement (PMC4249247)
Supplement: AEM.02530-14_zam999105861so1.pdf [file AEM.02530-14_zam999105861so1.pdf]

FIGURE S1 Growth of the parental strain 10403S and 15 isogenic mutants at 25°C in (A) DM with 10 mM glucose, (B) DM with 10 mM mannose, (C) DM with 10 mM cellobiose and (D) DM with 10 mM glycerol. The average OD values from the replicates were used to generate the growth curve.

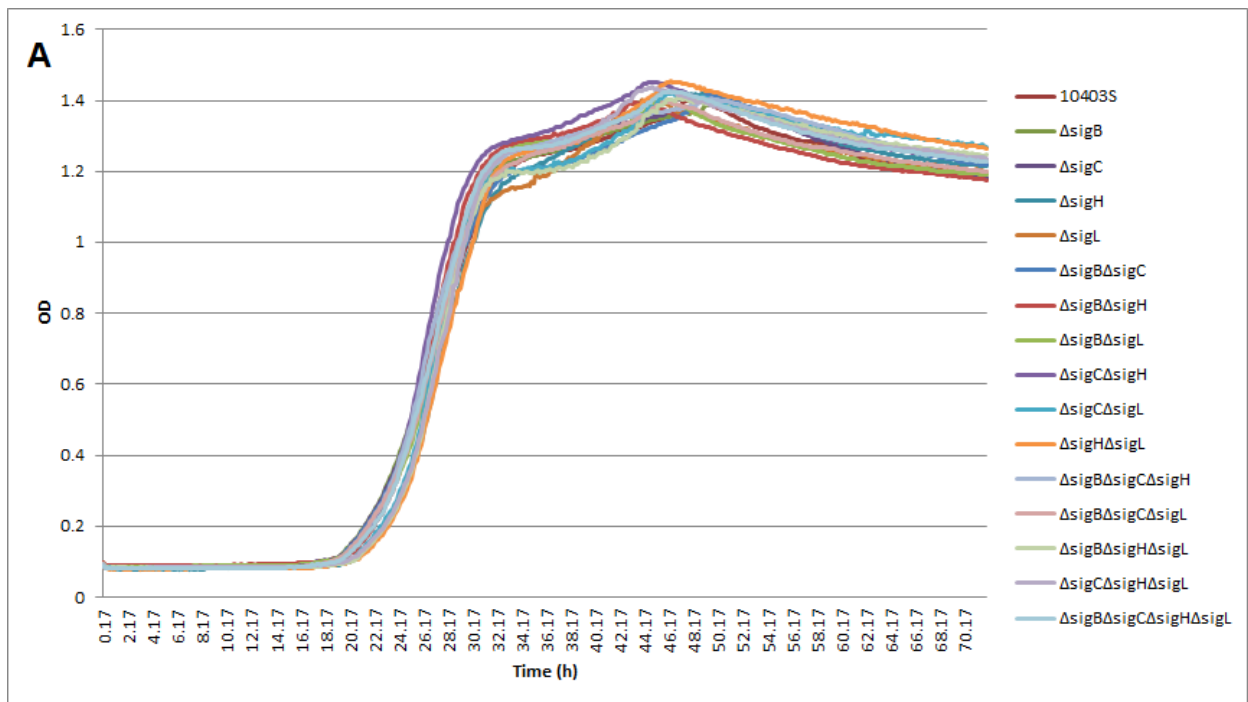

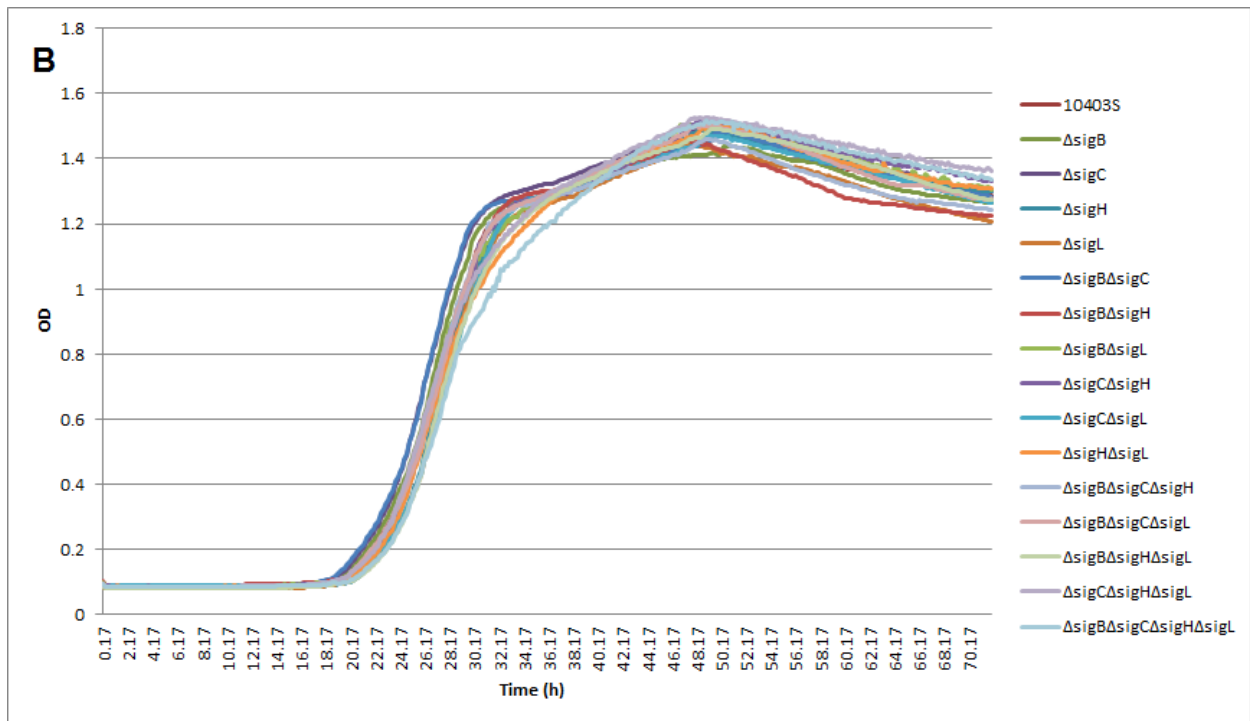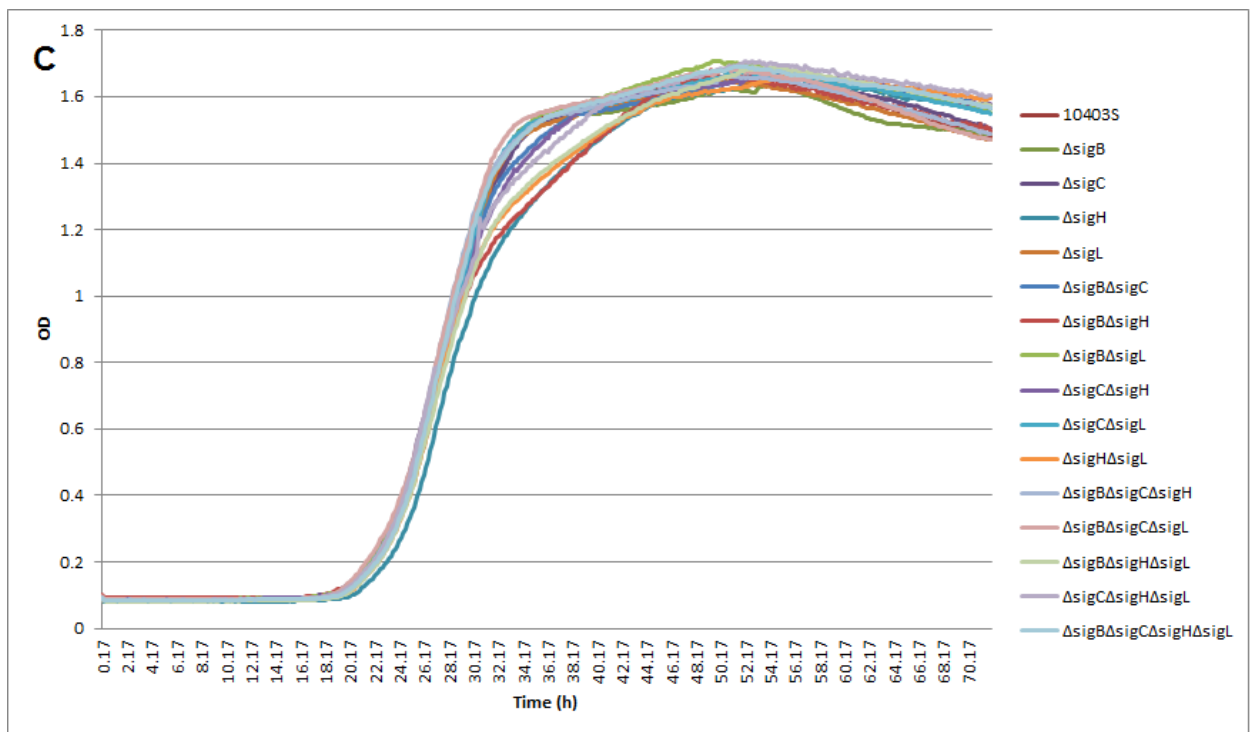

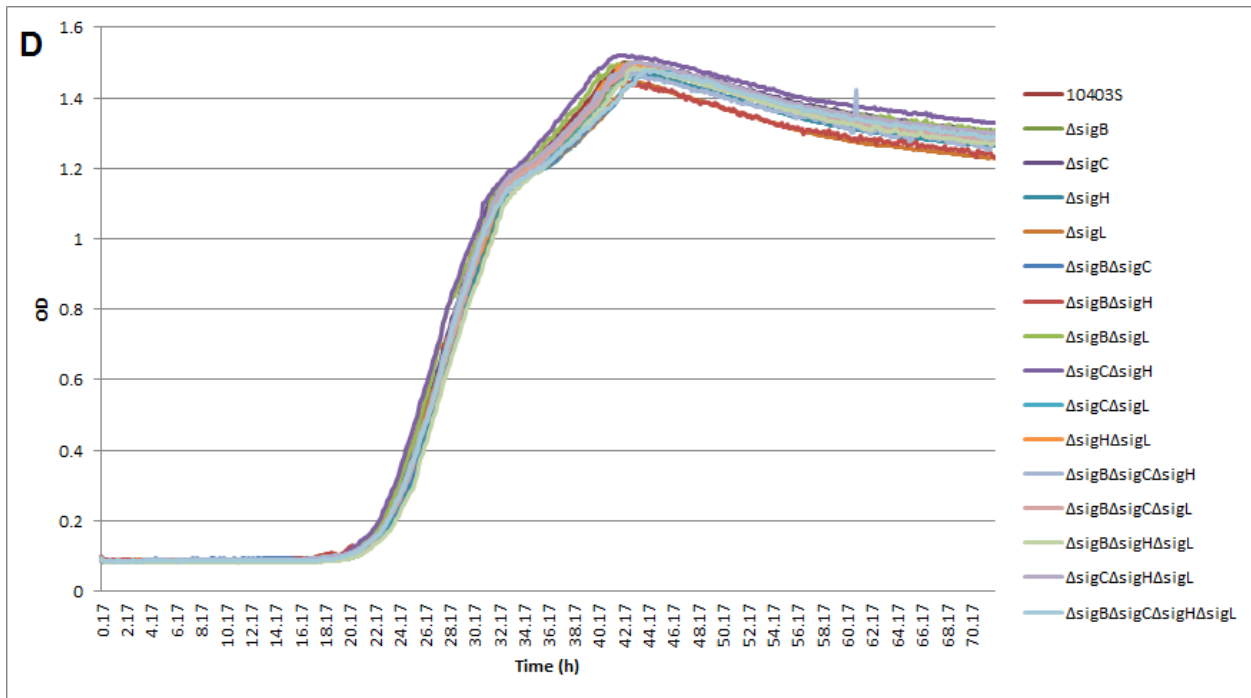

FIGURE S2 Growth of the parental strain 10403S and 15 isogenic mutants at 37°C in (A) DM with 10 mM glucose, (B) DM with 10 mM mannose, (C) DM with 10 mM cellobiose and (D) DM with 10 mM glycerol. The average OD values from the replicates were used to generate the growth curve.

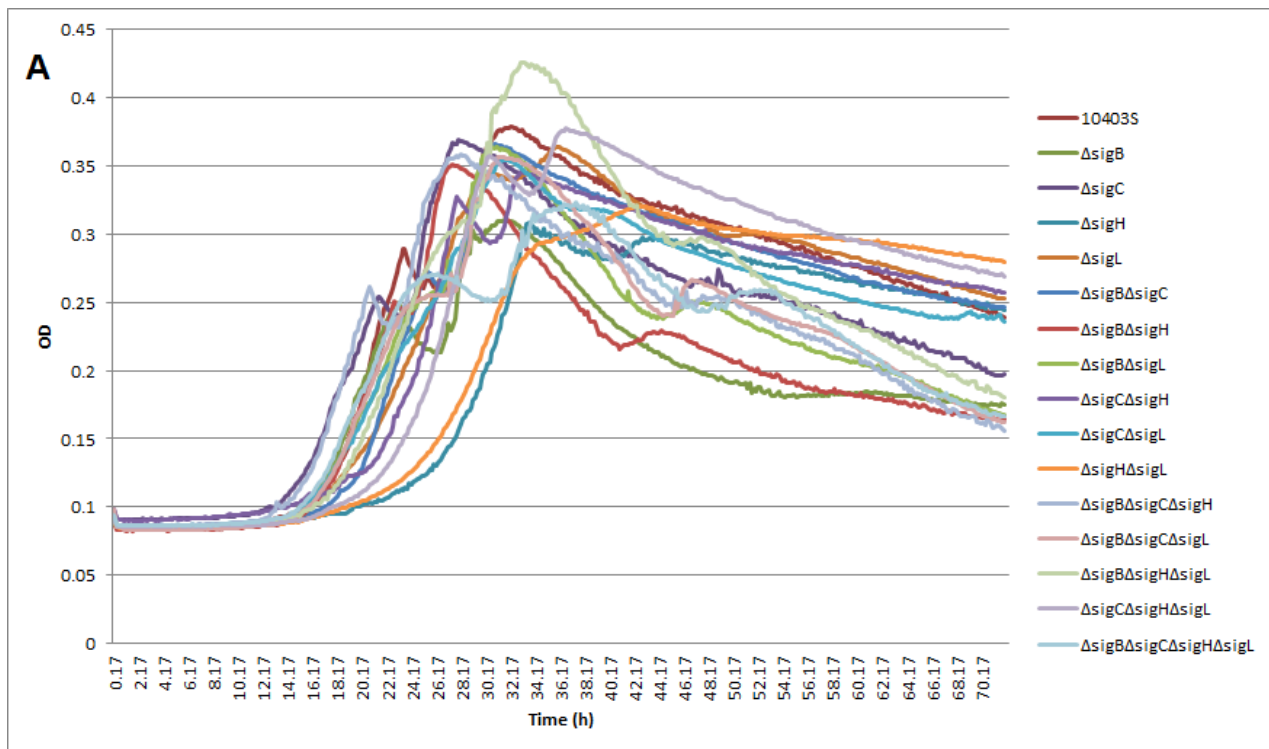

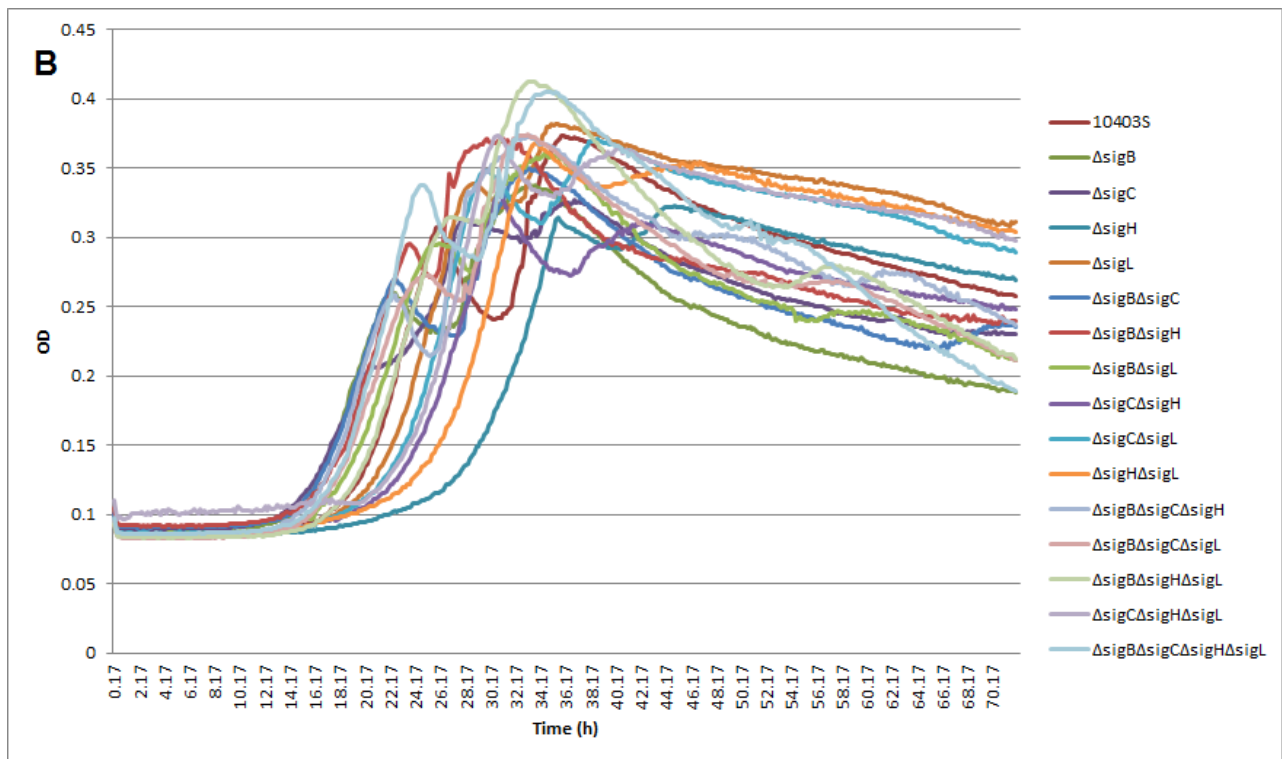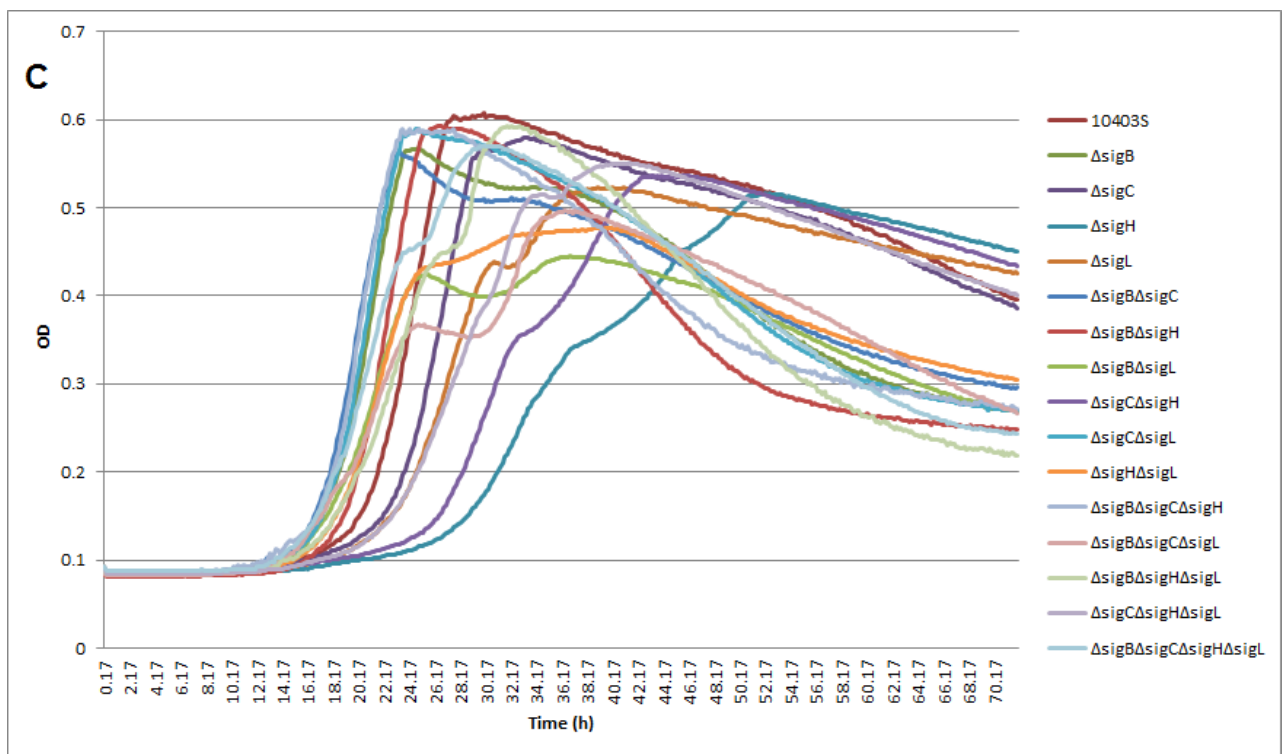



SUPPLEMENTAL TABLE 1 Optical density-derived growth parameters of *L. monocytogenes* 10403S and mutants at 25°C<sup>a</sup>

| Carbon Source                                  | Strain                                         | $\mu_{\max}$ [OD increase/hour] | $\lambda$ [hour]             | Maximum OD                  |             |
|------------------------------------------------|------------------------------------------------|---------------------------------|------------------------------|-----------------------------|-------------|
| Glucose                                        | $\Delta sigB$                                  | 0.119±0.004 <sup>ABC</sup>      | 20.404±0.251 <sup>CDE</sup>  | 1.380±0.029                 |             |
|                                                | $\Delta sigB\Delta sigC$                       | 0.119±0.014 <sup>ABC</sup>      | 19.402±0.479 <sup>E</sup>    | 1.357±0.073                 |             |
|                                                | $\Delta sigB\Delta sigC\Delta sigH$            | 0.116±0.009 <sup>BC</sup>       | 20.488±0.257 <sup>CDE</sup>  | 1.376±0.014                 |             |
|                                                | $\Delta sigB\Delta sigC\Delta sigH\Delta sigL$ | 0.134±0.004 <sup>ABC</sup>      | 21.812±0.468 <sup>AB</sup>   | 1.392±0.024                 |             |
|                                                | $\Delta sigB\Delta sigC\Delta sigL$            | 0.114±0.007 <sup>C</sup>        | 20.575±0.306 <sup>CDE</sup>  | 1.392±0.014                 |             |
|                                                | $\Delta sigB\Delta sigH$                       | 0.140±0.004 <sup>A</sup>        | 21.155±0.253 <sup>ABC</sup>  | 1.377±0.009                 |             |
|                                                | $\Delta sigB\Delta sigH\Delta sigL$            | 0.131±0.012 <sup>ABC</sup>      | 21.896±0.714 <sup>A</sup>    | 1.341±0.023                 |             |
|                                                | $\Delta sigB\Delta sigL$                       | 0.125±0.008 <sup>ABC</sup>      | 21.143±0.308 <sup>ABC</sup>  | 1.375±0.016                 |             |
|                                                | $\Delta sigC$                                  | 0.113±0.009 <sup>C</sup>        | 20.079±0.383 <sup>CDE</sup>  | 1.403±0.025                 |             |
|                                                | $\Delta sigC\Delta sigH$                       | 0.131±0.015 <sup>ABC</sup>      | 20.656±0.556 <sup>BCD</sup>  | 1.397±0.015                 |             |
|                                                | $\Delta sigC\Delta sigH\Delta sigL$            | 0.132±0.004 <sup>ABC</sup>      | 21.966±0.255 <sup>A</sup>    | 1.393±0.011                 |             |
|                                                | $\Delta sigC\Delta sigL$                       | 0.138±0.006 <sup>AB</sup>       | 21.843±0.317 <sup>A</sup>    | 1.390±0.049                 |             |
|                                                | $\Delta sigH$                                  | 0.116±0.009 <sup>BC</sup>       | 20.810±0.549 <sup>ABCD</sup> | 1.407±0.022                 |             |
|                                                | $\Delta sigH\Delta sigL$                       | 0.129±0.012 <sup>ABC</sup>      | 21.754±0.487 <sup>AB</sup>   | 1.359±0.033                 |             |
|                                                | $\Delta sigL$                                  | 0.128±0.010 <sup>ABC</sup>      | 21.824±0.471 <sup>AB</sup>   | 1.372±0.022                 |             |
|                                                | 10403S                                         |                                 | 0.117±0.001 <sup>ABC</sup>   | 19.817±0.813 <sup>DE</sup>  | 1.338±0.069 |
|                                                | Mannose                                        | $\Delta sigB$                   | 0.128±0.005 <sup>A</sup>     | 20.989±0.247 <sup>ABC</sup> | 1.419±0.038 |
| $\Delta sigB\Delta sigC$                       |                                                | 0.127±0.005 <sup>A</sup>        | 20.549±0.291 <sup>C</sup>    | 1.426±0.029                 |             |
| $\Delta sigB\Delta sigC\Delta sigH$            |                                                | 0.128±0.005 <sup>A</sup>        | 21.009±0.118 <sup>ABC</sup>  | 1.425±0.032                 |             |
| $\Delta sigB\Delta sigC\Delta sigH\Delta sigL$ |                                                | 0.099±0.008 <sup>C</sup>        | 20.950±0.215 <sup>ABC</sup>  | 1.499±0.014                 |             |
| $\Delta sigB\Delta sigC\Delta sigL$            |                                                | 0.126±0.011 <sup>A</sup>        | 20.724±0.752 <sup>BC</sup>   | 1.448±0.012                 |             |
| $\Delta sigB\Delta sigH$                       |                                                | 0.126±0.009 <sup>A</sup>        | 20.999±0.203 <sup>ABC</sup>  | 1.425±0.005                 |             |
| $\Delta sigB\Delta sigH\Delta sigL$            |                                                | 0.114±0.004 <sup>ABC</sup>      | 21.234±0.351 <sup>ABC</sup>  | 1.446±0.011                 |             |
| $\Delta sigB\Delta sigL$                       |                                                | 0.123±0.010 <sup>A</sup>        | 20.858±0.150 <sup>ABC</sup>  | 1.419±0.032                 |             |
| $\Delta sigC$                                  |                                                | 0.130±0.003 <sup>A</sup>        | 20.628±0.412 <sup>C</sup>    | 1.446±0.015                 |             |
| $\Delta sigC\Delta sigH$                       |                                                | 0.116±0.011 <sup>ABC</sup>      | 20.713±0.555 <sup>BC</sup>   | 1.444±0.016                 |             |
| $\Delta sigC\Delta sigH\Delta sigL$            |                                                | 0.115±0.009 <sup>ABC</sup>      | 21.139±0.706 <sup>ABC</sup>  | 1.475±0.013                 |             |
| $\Delta sigC\Delta sigL$                       |                                                | 0.119±0.014 <sup>AB</sup>       | 21.208±0.494 <sup>ABC</sup>  | 1.445±0.039                 |             |
| $\Delta sigH$                                  |                                                | 0.128±0.005 <sup>A</sup>        | 21.822±0.352 <sup>A</sup>    | 1.438±0.008                 |             |
| $\Delta sigH\Delta sigL$                       |                                                | 0.099±0.006 <sup>BC</sup>       | 20.602±0.052 <sup>C</sup>    | 1.485±0.034                 |             |
| $\Delta sigL$                                  |                                                | 0.128±0.006 <sup>A</sup>        | 21.658±0.162 <sup>AB</sup>   | 1.421±0.012                 |             |
| 10403S                                         |                                                |                                 | 0.121±0.004 <sup>A</sup>     | 20.781±0.098 <sup>BC</sup>  | 1.444±0.022 |
| Cellobiose                                     |                                                | $\Delta sigB$                   | 0.153±0.004 <sup>A</sup>     | 21.865±0.066                | 1.639±0.030 |
|                                                | $\Delta sigB\Delta sigC$                       | 0.148±0.006 <sup>A</sup>        | 21.754±0.115                 | 1.643±0.018                 |             |
|                                                | $\Delta sigB\Delta sigC\Delta sigH$            | 0.150±0.010 <sup>A</sup>        | 21.639±0.432                 | 1.641±0.023                 |             |
|                                                | $\Delta sigB\Delta sigC\Delta sigH\Delta sigL$ | 0.149±0.007 <sup>A</sup>        | 21.201±1.222                 | 1.658±0.010                 |             |

|          |                             |                            |              |              |             |
|----------|-----------------------------|----------------------------|--------------|--------------|-------------|
|          | <i>ΔsigBΔsigCΔsigL</i>      | 0.148±0.010 <sup>A</sup>   | 21.401±0.245 | 1.663±0.008  |             |
|          | <i>ΔsigBΔsigH</i>           | 0.112±0.012 <sup>C</sup>   | 20.670±0.408 | 1.634±0.016  |             |
|          | <i>ΔsigBΔsigHΔsigL</i>      | 0.133±0.014 <sup>ABC</sup> | 21.414±0.213 | 1.630±0.014  |             |
|          | <i>ΔsigBΔsigL</i>           | 0.152±0.010 <sup>A</sup>   | 21.407±0.141 | 1.645±0.019  |             |
|          | <i>ΔsigC</i>                | 0.152±0.010 <sup>A</sup>   | 21.847±0.530 | 1.651±0.007  |             |
|          | <i>ΔsigCΔsigH</i>           | 0.121±0.009 <sup>BC</sup>  | 21.149±0.285 | 1.645±0.021  |             |
|          | <i>ΔsigCΔsigHΔsigL</i>      | 0.141±0.013 <sup>AB</sup>  | 21.657±0.571 | 1.654±0.010  |             |
|          | <i>ΔsigCΔsigL</i>           | 0.152±0.008 <sup>A</sup>   | 21.748±0.088 | 1.661±0.027  |             |
|          | <i>ΔsigH</i>                | 0.113±0.006 <sup>C</sup>   | 21.384±0.222 | 1.629±0.012  |             |
|          | <i>ΔsigHΔsigL</i>           | 0.120±0.002 <sup>BC</sup>  | 20.944±0.271 | 1.616±0.012  |             |
|          | <i>ΔsigL</i>                | 0.154±0.006 <sup>A</sup>   | 21.814±0.220 | 1.645±0.010  |             |
|          | 10403S                      | 0.151±0.007 <sup>A</sup>   | 21.803±0.114 | 1.645±0.012  |             |
| Glycerol | <i>ΔsigB</i>                | 0.108±0.005                | 21.561±0.210 | 1.498±0.044  |             |
|          | <i>ΔsigBΔsigC</i>           | 0.107±0.004                | 21.314±0.476 | 1.496±0.041  |             |
|          | <i>ΔsigBΔsigCΔsigH</i>      | 0.108±0.004                | 21.359±0.350 | 1.507±0.039  |             |
|          | <i>ΔsigBΔsigCΔsigHΔsigL</i> | 0.106±0.013                | 21.352±0.295 | 1.480±0.014  |             |
|          | <i>ΔsigBΔsigCΔsigL</i>      | 0.101±0.009                | 21.100±0.429 | 1.494±0.055  |             |
|          | <i>ΔsigBΔsigH</i>           | 0.104±0.004                | 20.953±0.212 | 1.481±0.026  |             |
|          | <i>ΔsigBΔsigHΔsigL</i>      | 0.106±0.002                | 21.464±0.555 | 1.501±0.027  |             |
|          | <i>ΔsigBΔsigL</i>           | 0.107±0.001                | 21.012±0.307 | 1.500±0.034  |             |
|          | <i>ΔsigC</i>                | 0.106±0.004                | 21.281±0.248 | 1.494±0.048  |             |
|          | <i>ΔsigCΔsigH</i>           | 0.104±0.004                | 20.474±0.300 | 1.525±0.067  |             |
|          | <i>ΔsigCΔsigHΔsigL</i>      | 0.111±0.003                | 21.489±0.097 | 1.470±0.054  |             |
|          | <i>ΔsigCΔsigL</i>           | 0.104±0.005                | 21.334±0.296 | 1.517±0.030  |             |
|          | <i>ΔsigH</i>                | 0.107±0.004                | 21.231±0.420 | 1.488±0.032  |             |
|          | <i>ΔsigHΔsigL</i>           | 0.104±0.002                | 20.961±0.408 | 1.520±0.033  |             |
|          | <i>ΔsigL</i>                | 0.109±0.005                | 21.443±0.505 | 1.465±0.052  |             |
|          |                             | 10403S                     | 0.109±0.003  | 21.434±0.287 | 1.479±0.048 |

<sup>a</sup>Results are summarized by Mean ± Standard deviation for the bacterial strains tested in duplicate. Means within a given column with the same letter are not statistically different from each other in the same carbon source (overall  $\alpha = 0.05$ , Tukey's HSD).



SUPPLEMENTAL TABLE 2 Optical density-derived growth parameters of *L. monocytogenes* 10403S and mutants at 37°C<sup>a</sup>

| Carbon Source | Strain                                         | $\mu_{\max}$ [OD increase/hour] | $\lambda$ [hour]             | Maximum OD                   |
|---------------|------------------------------------------------|---------------------------------|------------------------------|------------------------------|
| Glucose       | $\Delta sigB$                                  | 0.032±0.002 <sup>ABCDE</sup>    | 16.096±0.372 <sup>E</sup>    | 0.144±0.012 <sup>F</sup>     |
|               | $\Delta sigB\Delta sigC$                       | 0.034±0.003 <sup>ABCDE</sup>    | 17.053±1.678 <sup>E</sup>    | 0.177±0.028 <sup>DEF</sup>   |
|               | $\Delta sigB\Delta sigC\Delta sigH$            | 0.038±0.004 <sup>ABC</sup>      | 15.503±0.769 <sup>E</sup>    | 0.170±0.021 <sup>EF</sup>    |
|               | $\Delta sigB\Delta sigC\Delta sigH\Delta sigL$ | 0.029±0.003 <sup>BCDE</sup>     | 16.607±0.419 <sup>E</sup>    | 0.176±0.021 <sup>EF</sup>    |
|               | $\Delta sigB\Delta sigC\Delta sigL$            | 0.024±0.001 <sup>E</sup>        | 15.851±0.462 <sup>E</sup>    | 0.254±0.011 <sup>A</sup>     |
|               | $\Delta sigB\Delta sigH$                       | 0.042±0.003 <sup>A</sup>        | 17.451±0.748 <sup>E</sup>    | 0.154±0.014 <sup>F</sup>     |
|               | $\Delta sigB\Delta sigH\Delta sigL$            | 0.036±0.002 <sup>ABCD</sup>     | 18.657±0.670 <sup>DE</sup>   | 0.198±0.020 <sup>CDE</sup>   |
|               | $\Delta sigB\Delta sigL$                       | 0.024±0.001 <sup>E</sup>        | 16.408±0.245 <sup>E</sup>    | 0.243±0.010 <sup>AB</sup>    |
|               | $\Delta sigC$                                  | 0.025±0.007 <sup>E</sup>        | 16.101±0.724 <sup>E</sup>    | 0.246±0.009 <sup>AB</sup>    |
|               | $\Delta sigC\Delta sigH$                       | 0.036±0.005 <sup>ABCD</sup>     | 20.786±1.933 <sup>CD</sup>   | 0.197±0.010 <sup>CDE</sup>   |
|               | $\Delta sigC\Delta sigH\Delta sigL$            | 0.038±0.006 <sup>AB</sup>       | 21.955±0.922 <sup>BC</sup>   | 0.241±0.015 <sup>AB</sup>    |
|               | $\Delta sigC\Delta sigL$                       | 0.037±0.004 <sup>ABCD</sup>     | 18.664±3.603 <sup>DE</sup>   | 0.200±0.034 <sup>CDE</sup>   |
|               | $\Delta sigH$                                  | 0.027±0.012 <sup>DE</sup>       | 26.297±3.438 <sup>A</sup>    | 0.194±0.019 <sup>CDE</sup>   |
|               | $\Delta sigH\Delta sigL$                       | 0.028±0.010 <sup>CDE</sup>      | 24.703±1.719 <sup>AB</sup>   | 0.221±0.020 <sup>ABC</sup>   |
|               | $\Delta sigL$                                  | 0.041±0.001 <sup>A</sup>        | 20.972±1.251 <sup>CD</sup>   | 0.245±0.004 <sup>AB</sup>    |
| 10403S        |                                                | 0.032±0.001 <sup>ABCDE</sup>    | 17.517±0.453 <sup>E</sup>    | 0.214±0.014 <sup>BCD</sup>   |
| Mannose       | $\Delta sigB$                                  | 0.016±0.004 <sup>C</sup>        | 13.576±0.394 <sup>K</sup>    | 0.261±0.008 <sup>AB</sup>    |
|               | $\Delta sigB\Delta sigC$                       | 0.019±0.003 <sup>BC</sup>       | 13.963±0.587 <sup>JK</sup>   | 0.284±0.007 <sup>AB</sup>    |
|               | $\Delta sigB\Delta sigC\Delta sigH$            | 0.027±0.004 <sup>ABC</sup>      | 15.508±0.344 <sup>IJK</sup>  | 0.249±0.007 <sup>AB</sup>    |
|               | $\Delta sigB\Delta sigC\Delta sigH\Delta sigL$ | 0.036±0.008 <sup>A</sup>        | 17.186±0.638 <sup>GHI</sup>  | 0.286±0.013 <sup>AB</sup>    |
|               | $\Delta sigB\Delta sigC\Delta sigL$            | 0.024±0.006 <sup>ABC</sup>      | 15.952±1.044 <sup>HIJK</sup> | 0.274±0.039 <sup>AB</sup>    |
|               | $\Delta sigB\Delta sigH$                       | 0.028±0.008 <sup>ABC</sup>      | 16.527±1.219 <sup>GHIJ</sup> | 0.217±0.037 <sup>B</sup>     |
|               | $\Delta sigB\Delta sigH\Delta sigL$            | 0.032±0.003 <sup>A</sup>        | 19.051±0.817 <sup>EFG</sup>  | 0.273±0.014 <sup>AB</sup>    |
|               | $\Delta sigB\Delta sigL$                       | 0.027±0.003 <sup>ABC</sup>      | 16.788±0.996 <sup>GHI</sup>  | 0.23±0.0310 <sup>B</sup>     |
|               | $\Delta sigC$                                  | 0.024±0.006 <sup>ABC</sup>      | 18.213±2.347 <sup>EFGH</sup> | 0.271±0.073 <sup>AB</sup>    |
|               | $\Delta sigC\Delta sigH$                       | 0.025±0.007 <sup>ABC</sup>      | 22.515±1.925 <sup>CD</sup>   | 0.277±0.112 <sup>AB</sup>    |
|               | $\Delta sigC\Delta sigH\Delta sigL$            | 0.035±0.005 <sup>A</sup>        | 22.882±1.156 <sup>BC</sup>   | 0.298±0.058 <sup>AB</sup>    |
|               | $\Delta sigC\Delta sigL$                       | 0.029±0.010 <sup>ABC</sup>      | 19.980±1.688 <sup>DEF</sup>  | 0.303±0.048 <sup>AB</sup>    |
|               | $\Delta sigH$                                  | 0.024±0.007 <sup>ABC</sup>      | 25.797±1.518 <sup>A</sup>    | 0.235±0.012 <sup>AB</sup>    |
|               | $\Delta sigH\Delta sigL$                       | 0.033±0.008 <sup>A</sup>        | 25.492±2.029 <sup>AB</sup>   | 0.293±0.062 <sup>AB</sup>    |
|               | $\Delta sigL$                                  | 0.031±0.007 <sup>AB</sup>       | 20.307±0.555 <sup>CDE</sup>  | 0.290±0.045 <sup>AB</sup>    |
| 10403S        |                                                | 0.025±0.007 <sup>ABC</sup>      | 17.455±0.883 <sup>FGHI</sup> | 0.339±0.091 <sup>A</sup>     |
| Cellobiose    | $\Delta sigB$                                  | 0.076±0.004 <sup>A</sup>        | 15.147±0.488 <sup>CDE</sup>  | 0.409±0.006 <sup>BCDEF</sup> |
|               | $\Delta sigB\Delta sigC$                       | 0.072±0.006 <sup>A</sup>        | 14.596±0.666 <sup>CDE</sup>  | 0.419±0.011 <sup>BCDEF</sup> |
|               | $\Delta sigB\Delta sigC\Delta sigH$            | 0.082±0.006 <sup>A</sup>        | 15.486±0.720 <sup>CDE</sup>  | 0.411±0.014 <sup>BCDEF</sup> |
|               | $\Delta sigB\Delta sigC\Delta sigH\Delta sigL$ | 0.048±0.006 <sup>BCD</sup>      | 14.483±1.915 <sup>CDE</sup>  | 0.400±0.015 <sup>CDEF</sup>  |
|               | $\Delta sigB\Delta sigC\Delta sigL$            | 0.027±0.005 <sup>CDE</sup>      | 10.412±1.384 <sup>E</sup>    | 0.403±0.019 <sup>CDEF</sup>  |

|          |                             |                             |                             |                              |
|----------|-----------------------------|-----------------------------|-----------------------------|------------------------------|
|          | <i>ΔsigBΔsigH</i>           | 0.076±0.006 <sup>A</sup>    | 17.215±0.946 <sup>CDE</sup> | 0.396±0.027 <sup>DEF</sup>   |
|          | <i>ΔsigBΔsigHΔsigL</i>      | 0.042±0.006 <sup>BCDE</sup> | 14.989±1.437 <sup>CDE</sup> | 0.389±0.023 <sup>EF</sup>    |
|          | <i>ΔsigBΔsigL</i>           | 0.026±0.005 <sup>E</sup>    | 10.957±4.086 <sup>DE</sup>  | 0.382±0.038 <sup>F</sup>     |
|          | <i>ΔsigC</i>                | 0.060±0.008 <sup>AB</sup>   | 21.003±1.231 <sup>BC</sup>  | 0.515±0.028 <sup>ABC</sup>   |
|          | <i>ΔsigCΔsigH</i>           | 0.049±0.009 <sup>BC</sup>   | 25.281±4.232 <sup>AB</sup>  | 0.504±0.012 <sup>ABCDE</sup> |
|          | <i>ΔsigCΔsigHΔsigL</i>      | 0.040±0.008 <sup>BCDE</sup> | 19.399±1.767 <sup>BC</sup>  | 0.521±0.053 <sup>AB</sup>    |
|          | <i>ΔsigCΔsigL</i>           | 0.045±0.034 <sup>BCDE</sup> | 13.941±1.081 <sup>CDE</sup> | 0.485±0.067 <sup>ABCDE</sup> |
|          | <i>ΔsigH</i>                | 0.043±0.013 <sup>BCDE</sup> | 28.584±7.804 <sup>A</sup>   | 0.541±0.091 <sup>A</sup>     |
|          | <i>ΔsigHΔsigL</i>           | 0.032±0.004 <sup>CDE</sup>  | 20.326±5.696 <sup>BC</sup>  | 0.513±0.111 <sup>ABCD</sup>  |
|          | <i>ΔsigL</i>                | 0.027±0.007 <sup>DE</sup>   | 21.115±8.382 <sup>ABC</sup> | 0.420±0.143 <sup>BCDEF</sup> |
|          | 10403S                      | 0.072±0.009 <sup>A</sup>    | 18.432±0.871 <sup>BCD</sup> | 0.521±0.019 <sup>AB</sup>    |
| Glycerol | <i>ΔsigB</i>                | 0.012±0.003                 | 43.367±3.537                | 0.222±0.046                  |
|          | <i>ΔsigBΔsigC</i>           | 0.021±0.008                 | 34.919±8.743                | 0.339±0.169                  |
|          | <i>ΔsigBΔsigCΔsigH</i>      | 0.019±0.007                 | 34.314±9.599                | 0.344±0.167                  |
|          | <i>ΔsigBΔsigCΔsigHΔsigL</i> | 0.020±0.013                 | 47.496±16.717               | 0.793±0.734                  |
|          | <i>ΔsigBΔsigCΔsigL</i>      | 0.016±0.010                 | 44.392±13.758               | 0.518±0.225                  |
|          | <i>ΔsigBΔsigH</i>           | 0.022±0.004                 | 46.729±6.046                | 0.316±0.099                  |
|          | <i>ΔsigBΔsigHΔsigL</i>      | 0.017±0.003                 | 49.138±6.570                | 0.358±0.132                  |
|          | <i>ΔsigBΔsigL</i>           | 0.014±0.010                 | 44.119±13.527               | 0.348±0.121                  |
|          | <i>ΔsigC</i>                | 0.022±0.009                 | 34.433±8.482                | 0.381±0.129                  |
|          | <i>ΔsigCΔsigH</i>           | 0.018±0.006                 | 32.705±11.883               | 0.383±0.105                  |
|          | <i>ΔsigCΔsigHΔsigL</i>      | 0.025±0.013                 | 35.034±7.571                | 0.394±0.132                  |
|          | <i>ΔsigCΔsigL</i>           | 0.022±0.007                 | 28.243±6.893                | 0.419±0.131                  |
|          | <i>ΔsigH</i>                | 0.018±0.005                 | 32.801±10.221               | 0.376±0.130                  |
|          | <i>ΔsigHΔsigL</i>           | 0.019±0.010                 | 37.829±6.916                | 0.321±0.123                  |
|          | <i>ΔsigL</i>                | 0.024±0.008                 | 38.435±6.586                | 0.317±0.119                  |
|          | 10403S                      | 0.022±0.009                 | 37.266±5.459                | 0.322±0.117                  |

<sup>a</sup> Results are summarized by Mean ± Standard deviation for the bacterial strains tested in duplicate. Means within a given column with the same letter are not statistically different from each other in the same carbon source (overall  $\alpha = 0.05$ , Tukey's HSD).

Supplemental Table 3: Linear model of lag phase duration in the presence of mannose

| Variable/Interactions <sup>a</sup> | Estimate | Standard Error | <i>p</i> -value |
|------------------------------------|----------|----------------|-----------------|
| Intercept <sup>b</sup>             | 17.3976  | 0.4509         | 3.2E-55         |
| sigmaB                             | 5.3165   | 0.6376         | 1.3E-12         |
| sigmaC                             | 1.4417   | 0.5206         | 6.9E-03         |
| sigmaH                             | -1.1394  | 0.6376         | 7.8E-02         |
| sigmaL                             | -2.1010  | 0.5206         | 1.2E-04         |
| sigmaB:sigmaC                      | 1.5044   | 0.7362         | 4.4E-02         |
| sigmaB:sigmaH                      | -1.3232  | 0.9017         | 1.5E-01         |
| sigmaB:sigmaL                      | 2.0696   | 0.7362         | 6.1E-03         |
| sigmaC:sigmaH                      | -1.2172  | 0.7362         | 1.0E-01         |
| sigmaH:sigmaL                      | -0.4999  | 0.7362         | 5.0E-01         |
| sigmaB:sigmaC:sigmaH               | -1.9439  | 1.0412         | 6.5E-02         |
| sigmaB:sigmaH:sigmaL               | -1.7787  | 1.0412         | 9.1E-02         |

<sup>a</sup> Interaction terms are represented by ":" between interacting predictors.

<sup>b</sup> Intercept represents lag phase duration of the  $\Delta sigBCHL$  strain.

Supplemental Table 4: Linear model of growth rate in the presence of mannose

| Variable/Interactions <sup>a</sup> | Estimate | Standard Error | <i>p</i> -value |
|------------------------------------|----------|----------------|-----------------|
| Intercept <sup>b</sup>             | 0.0364   | 0.4509         | 9.8E-32         |
| sigmaB                             | -0.0016  | 0.6376         | 3.8E-01         |
| sigmaC                             | -0.0035  | 0.5206         | 1.6E-01         |
| sigmaH                             | -0.0131  | 0.6376         | 9.6E-06         |
| sigmaL                             | -0.0099  | 0.5206         | 1.4E-04         |
| sigmaB:sigmaH                      | 0.0073   | 0.7362         | 4.2E-03         |
| sigmaC:sigmaH                      | 0.0062   | 0.9017         | 8.2E-02         |
| sigmaC:sigmaL                      | 0.0041   | 0.7362         | 2.5E-01         |
| sigmaH:sigmaL                      | 0.0049   | 0.7362         | 1.7E-01         |
| sigmaC:sigmaH:sigmaL               | -0.0075  | 0.7362         | 1.4E-01         |

<sup>a</sup> Interaction terms are represented by ":" between interacting predictors.

<sup>b</sup> Intercept represents the growth rate of the  $\Delta sigBCHL$  strain.

Supplemental Table 5: Linear model of maximum growth in the presence of mannose

| Variable/Interactions <sup>a</sup> | Estimate | Standard Error | <i>p</i> -value |
|------------------------------------|----------|----------------|-----------------|
| Intercept <sup>b</sup>             | 0.2821   | 0.0179         | 7.30E-27        |
| sigmaB                             | 0.0199   | 0.0206         | 3.40E-01        |
| sigmaC                             | -0.0082  | 0.0253         | 7.50E-01        |
| sigmaH                             | 0.0028   | 0.0253         | 9.10E-01        |
| sigmaL                             | -0.0289  | 0.0206         | 1.60E-01        |
| sigmaB:sigmaC                      | -0.0014  | 0.0292         | 9.60E-01        |
| sigmaB:sigmaH                      | -0.0123  | 0.0292         | 6.70E-01        |
| sigmaC:sigmaH                      | -0.0512  | 0.0357         | 1.60E-01        |
| sigmaC:sigmaL                      | -0.0282  | 0.0292         | 3.40E-01        |
| sigmaH:sigmaL                      | 0.018    | 0.0292         | 5.40E-01        |
| sigmaB:sigmaC:sigmaH               | 0.0627   | 0.0413         | 1.30E-01        |
| sigmaC:sigmaH:sigmaL               | 0.0792   | 0.0413         | 5.80E-02        |

<sup>a</sup> Interaction terms are represented by ":" between interacting predictors.

<sup>b</sup> Intercept represents maximum growth of the  $\Delta sigBCHL$  strain.

Supplemental Table 6: Linear model of lag phase duration in the presence of cellobiose

| Variable/Interactions <sup>a</sup> | Estimate | Standard Error | <i>p</i> -value |
|------------------------------------|----------|----------------|-----------------|
| Intercept <sup>b</sup>             | 14.4829  | 1.4948         | 3.9E-15         |
| sigmaB                             | 4.9163   | 2.1140         | 2.3E-02         |
| sigmaC                             | 0.5060   | 2.1140         | 8.1E-01         |
| sigmaH                             | -4.0709  | 2.1140         | 5.8E-02         |
| sigmaL                             | 1.0033   | 2.1140         | 6.4E-01         |
| sigmaB:sigmaC                      | 0.4208   | 2.9897         | 8.9E-01         |
| sigmaB:sigmaH                      | -1.3871  | 2.9897         | 6.4E-01         |
| sigmaB:sigmaL                      | 4.8786   | 2.9897         | 1.1E-01         |
| sigmaC:sigmaH                      | 0.0389   | 2.9897         | 9.9E-01         |
| sigmaC:sigmaL                      | 1.2228   | 2.9897         | 6.8E-01         |
| sigmaH:sigmaL                      | 3.1809   | 2.9897         | 2.9E-01         |
| sigmaB:sigmaC:sigmaH               | 6.2078   | 4.2280         | 1.5E-01         |
| sigmaB:sigmaC:sigmaL               | 1.1530   | 4.2280         | 7.9E-01         |
| sigmaB:sigmaH:sigmaL               | -2.0011  | 4.2280         | 6.4E-01         |
| sigmaC:sigmaH:sigmaL               | -1.2168  | 4.2280         | 7.7E-01         |
| sigmaB:sigmaC:sigmaH:sigmaL        | -10.9037 | 5.9793         | 7.2E-02         |

<sup>a</sup> Interaction terms are represented by ":" between interacting predictors.

<sup>b</sup> Intercept represents lag phase duration of the  $\Delta sigBCHL$  strain.

Supplemental Table 7: Linear model of growth rate in the presence of cellobiose

| Variable/Interactions <sup>a</sup> | Estimate | Standard Error | <i>p</i> -value |
|------------------------------------|----------|----------------|-----------------|
| Intercept <sup>b</sup>             | 0.0484   | 0.0044         | 1.8E-17         |
| sigmaB                             | -0.0086  | 0.0063         | 1.7E-01         |
| sigmaC                             | -0.0065  | 0.0063         | 3.0E-01         |
| sigmaH                             | -0.0212  | 0.0063         | 1.1E-03         |
| sigmaL                             | 0.0337   | 0.0063         | 7.8E-07         |
| sigmaB:sigmaC                      | -0.0013  | 0.0089         | 8.8E-01         |
| sigmaB:sigmaH                      | 0.0267   | 0.0089         | 3.5E-03         |
| sigmaB:sigmaL                      | -0.0241  | 0.0089         | 8.2E-03         |
| sigmaC:sigmaH                      | 0.0054   | 0.0089         | 5.5E-01         |
| sigmaC:sigmaL                      | 0.0002   | 0.0089         | 9.8E-01         |
| sigmaH:sigmaL                      | 0.0116   | 0.0089         | 2.0E-01         |
| sigmaB:sigmaC:sigmaH               | -0.0163  | 0.0126         | 2.0E-01         |
| sigmaB:sigmaC:sigmaL               | 0.0013   | 0.0126         | 9.2E-01         |
| sigmaB:sigmaH:sigmaL               | -0.0062  | 0.0126         | 6.2E-01         |
| sigmaC:sigmaH:sigmaL               | 0.0045   | 0.0126         | 7.2E-01         |
| sigmaB:sigmaC:sigmaH:sigmaL        | 0.0250   | 0.0178         | 1.6E-01         |

<sup>a</sup> Interaction terms are represented by ":" between interacting predictors.

<sup>b</sup> Intercept represents growth rate of the  $\Delta sigBCHL$  strain.

Supplemental Table 8: Linear model of maximum growth in the presence of cellobiose

| Variable/Interactions <sup>a</sup> | Estimate | Standard Error | <i>p</i> -value |
|------------------------------------|----------|----------------|-----------------|
| Intercept <sup>b</sup>             | 0.3957   | 0.0142         | 6.25E-46        |
| sigmaB                             | 0.1208   | 0.0164         | 9.00E-11        |
| sigmaH                             | -0.0142  | 0.0201         | 0.482947        |
| sigmaL                             | 0.0068   | 0.0164         | 0.679019        |
| sigmaB:sigmaH                      | -0.0390  | 0.0233         | 0.097427        |
| sigmaH:sigmaL                      | 0.0367   | 0.0233         | 0.118088        |

<sup>a</sup> Interaction terms are represented by ":" between interacting predictors.

<sup>b</sup> Intercept represents maximum growth of the  $\Delta sigBCHL$  strain.



Supplemental Table 9: Linear model of lag phase duration in the presence of glucose

| Variable/Interactions <sup>a</sup> | Estimate | Standard Error | <i>p</i> -value |
|------------------------------------|----------|----------------|-----------------|
| Intercept <sup>b</sup>             | 16.7388  | 0.5965         | 8.4E-44         |
| sigmaB                             | 5.0844   | 0.7810         | 5.6E-09         |
| sigmaC                             | 1.7868   | 0.7810         | 2.5E-02         |
| sigmaH                             | -1.0191  | 0.7810         | 2.0E-01         |
| sigmaL                             | -1.3846  | 0.8436         | 1.0E-01         |
| sigmaB:sigmaC                      | 1.2244   | 0.9018         | 1.8E-01         |
| sigmaB:sigmaH                      | -2.0086  | 0.9018         | 2.9E-02         |
| sigmaB:sigmaL                      | 0.4961   | 1.1045         | 6.5E-01         |
| sigmaC:sigmaH                      | -0.9669  | 0.9018         | 2.9E-01         |
| sigmaC:sigmaL                      | 0.4587   | 1.1045         | 6.8E-01         |
| sigmaH:sigmaL                      | 2.8664   | 1.1045         | 1.1E-02         |
| sigmaB:sigmaC:sigmaL               | 1.7432   | 1.2754         | 1.8E-01         |
| sigmaB:sigmaH:sigmaL               | -4.8211  | 1.2754         | 3.0E-04         |
| sigmaC:sigmaH:sigmaL               | -2.5332  | 1.2754         | 5.0E-02         |

<sup>a</sup> Interaction terms are represented by ":" between interacting predictors.

<sup>b</sup> Intercept represents lag phase duration of the  $\Delta sigBCHL$  strain.

Supplemental Table 10: Linear model of growth rate in the presence of glucose

| Variable/Interactions <sup>a</sup> | Estimate | Standard Error | <i>p</i> -value |
|------------------------------------|----------|----------------|-----------------|
| Intercept <sup>b</sup>             | 0.0289   | 0.0019         | 5.2E-25         |
| sigmaB                             | 0.0095   | 0.0028         | 9.1E-04         |
| sigmaC                             | 0.0072   | 0.0025         | 5.6E-03         |
| sigmaH                             | -0.0053  | 0.0025         | 4.2E-02         |
| sigmaL                             | 0.0088   | 0.0025         | 9.2E-04         |
| sigmaB:sigmaC                      | -0.0182  | 0.0036         | 2.5E-06         |
| sigmaB:sigmaH                      | 0.0041   | 0.0036         | 2.6E-01         |
| sigmaB:sigmaL                      | -0.0116  | 0.0036         | 1.8E-03         |
| sigmaC:sigmaH                      | -0.0069  | 0.0029         | 2.2E-02         |
| sigmaC:sigmaL                      | -0.0032  | 0.0029         | 2.9E-01         |
| sigmaH:sigmaL                      | 0.0019   | 0.0029         | 5.2E-01         |
| sigmaB:sigmaC:sigmaH               | 0.0215   | 0.0042         | 1.6E-06         |
| sigmaB:sigmaC:sigmaL               | 0.0060   | 0.0042         | 1.5E-01         |
| sigmaB:sigmaH:sigmaL               | -0.0114  | 0.0042         | 7.4E-03         |

<sup>a</sup> Interaction terms are represented by ":" between interacting predictors.

<sup>b</sup> Intercept represents growth rate of the  $\Delta sigBCHL$  strain.

Supplemental Table 11: Linear model of maximum growth in the presence of glucose

| Variable/Interactions <sup>a</sup> | Estimate | Standard Error | <i>p</i> -value |
|------------------------------------|----------|----------------|-----------------|
| Intercept <sup>b</sup>             | 0.1755   | 0.0074         | 6.3E-38         |
| sigmaB                             | 0.0655   | 0.0105         | 1.8E-08         |
| sigmaC                             | 0.0229   | 0.0105         | 3.1E-02         |
| sigmaH                             | 0.0790   | 0.0105         | 6.4E-11         |
| sigmaL                             | -0.0055  | 0.0105         | 6.0E-01         |
| sigmaB:sigmaC                      | -0.0434  | 0.0148         | 4.4E-03         |
| sigmaB:sigmaH                      | -0.1205  | 0.0148         | 4.4E-12         |
| sigmaB:sigmaL                      | -0.0383  | 0.0148         | 1.2E-02         |
| sigmaC:sigmaH                      | -0.0344  | 0.0148         | 2.3E-02         |
| sigmaC:sigmaL                      | -0.0388  | 0.0148         | 1.1E-02         |
| sigmaH:sigmaL                      | -0.0715  | 0.0148         | 6.5E-06         |
| sigmaB:sigmaC:sigmaH               | 0.0999   | 0.0209         | 8.1E-06         |
| sigmaB:sigmaC:sigmaL               | 0.0563   | 0.0209         | 8.7E-03         |
| sigmaB:sigmaH:sigmaL               | 0.1619   | 0.0209         | 2.7E-11         |
| sigmaC:sigmaH:sigmaL               | 0.0172   | 0.0209         | 4.1E-01         |
| sigmaB:sigmaC:sigmaH:sigmaL        | -0.1122  | 0.0296         | 2.9E-04         |

<sup>a</sup> Interaction terms are represented by ":" between interacting predictors.

<sup>b</sup> Intercept represents maximum growth of the  $\Delta sigBCHL$  strain.

Supplemental Table 12: Linear model of lag phase duration in the presence of glycerol

| Variable/Interactions <sup>a</sup> | Estimate | Standard Error | <i>p</i> -value |
|------------------------------------|----------|----------------|-----------------|
| Intercept <sup>b</sup>             | 45.9439  | 3.2043         | 2.1E-20         |
| sigmaB                             | -14.3054 | 4.5316         | 2.6E-03         |
| sigmaC                             | 0.6847   | 4.5316         | 8.8E-01         |
| sigmaL                             | -11.3271 | 4.5316         | 1.5E-02         |
| sigmaB:sigmaC                      | 5.8088   | 6.4086         | 3.7E-01         |
| sigmaB:sigmaL                      | 13.2576  | 6.4086         | 4.3E-02         |
| sigmaC:sigmaL                      | 9.7462   | 6.4086         | 1.3E-01         |
| sigmaB:sigmaC:sigmaL               | -14.7750 | 9.0631         | 1.1E-01         |

<sup>a</sup> Interaction terms are represented by ":" between interacting predictors.

<sup>b</sup> Intercept represents lag phase duration of the  $\Delta sigBCHL$  strain.

Supplemental Table 13: Linear model of growth rate in the presence of glycerol

| Variable/Interactions <sup>a</sup> | Estimate | Standard Error | <i>p</i> -value |
|------------------------------------|----------|----------------|-----------------|
| Intercept <sup>b</sup>             | 0.0193   | 0.0020         | 4.6E-14         |
| sigmaB                             | 0.0007   | 0.0028         | 8.2E-01         |
| sigmaH                             | -0.0036  | 0.0028         | 2.1E-01         |
| sigmaB:sigmaH                      | 0.0060   | 0.0039         | 1.4E-01         |

<sup>a</sup> Interaction terms are represented by ":" between interacting predictors.

<sup>b</sup> Intercept represents growth rate of the  $\Delta sigBCHL$  strain.

Supplemental Table 14: Linear model maximum growth in the presence of glycerol

| Variable/Interactions <sup>a</sup> | Estimate | Standard Error | <i>p</i> -value |
|------------------------------------|----------|----------------|-----------------|
| Intercept <sup>b</sup>             | 0.5664   | 0.0608         | 3.4E-13         |
| sigmaB                             | -0.1417  | 0.0769         | 7.0E-02         |
| sigmaC                             | -0.1241  | 0.0544         | 2.6E-02         |
| sigmaL                             | -0.1992  | 0.0769         | 1.2E-02         |
| sigmaB:sigmaL                      | 0.2022   | 0.1087         | 6.8E-02         |

<sup>a</sup> Interaction terms are represented by ":" between interacting predictors.

<sup>b</sup> Intercept represents maximum growth of the  $\Delta sigBCHL$  strain.
